# Supplementary material for: Structure of human drug transporters OATP1B1 and OATP1B3
Source: Springer Nature journal article supplement (doi:10.1038/s41467-023-41552-8), 2023-09-18
Supplement: MOESM1 [file 41467_2023_41552_MOESM1_ESM.pdf › 41467_2023_41552_MOESM1_ESM.pdf]

## SUPPLEMENTARY INFORMATION FOR:

### Structure of human drug transporters OATP1B1 and OATP1B3

Anca-Denise Ciută<sup>1,3</sup>, Kamil Nosol<sup>1,3</sup>, Julia Kowal<sup>1,3</sup>, Somnath Mukherjee<sup>2,3</sup>, Ana S. Ramírez<sup>1</sup>,  
Bruno Stieger<sup>1</sup>, Anthony A. Kossiakoff<sup>2</sup>, Kaspar P. Locher<sup>1†</sup>

<sup>1</sup> Institute of Molecular Biology and Biophysics, Department of Biology, ETH Zürich, Zürich, Switzerland

<sup>2</sup> Department of Biochemistry and Molecular Biology, The University of Chicago, Chicago, IL, USA

<sup>3</sup> Authors have contributed equally

† To whom correspondence should be addressed: [locher@mol.biol.ethz.ch](mailto:locher@mol.biol.ethz.ch)

#### **This file contains:**

Supplementary Figures 1-8

Supplementary Table 1

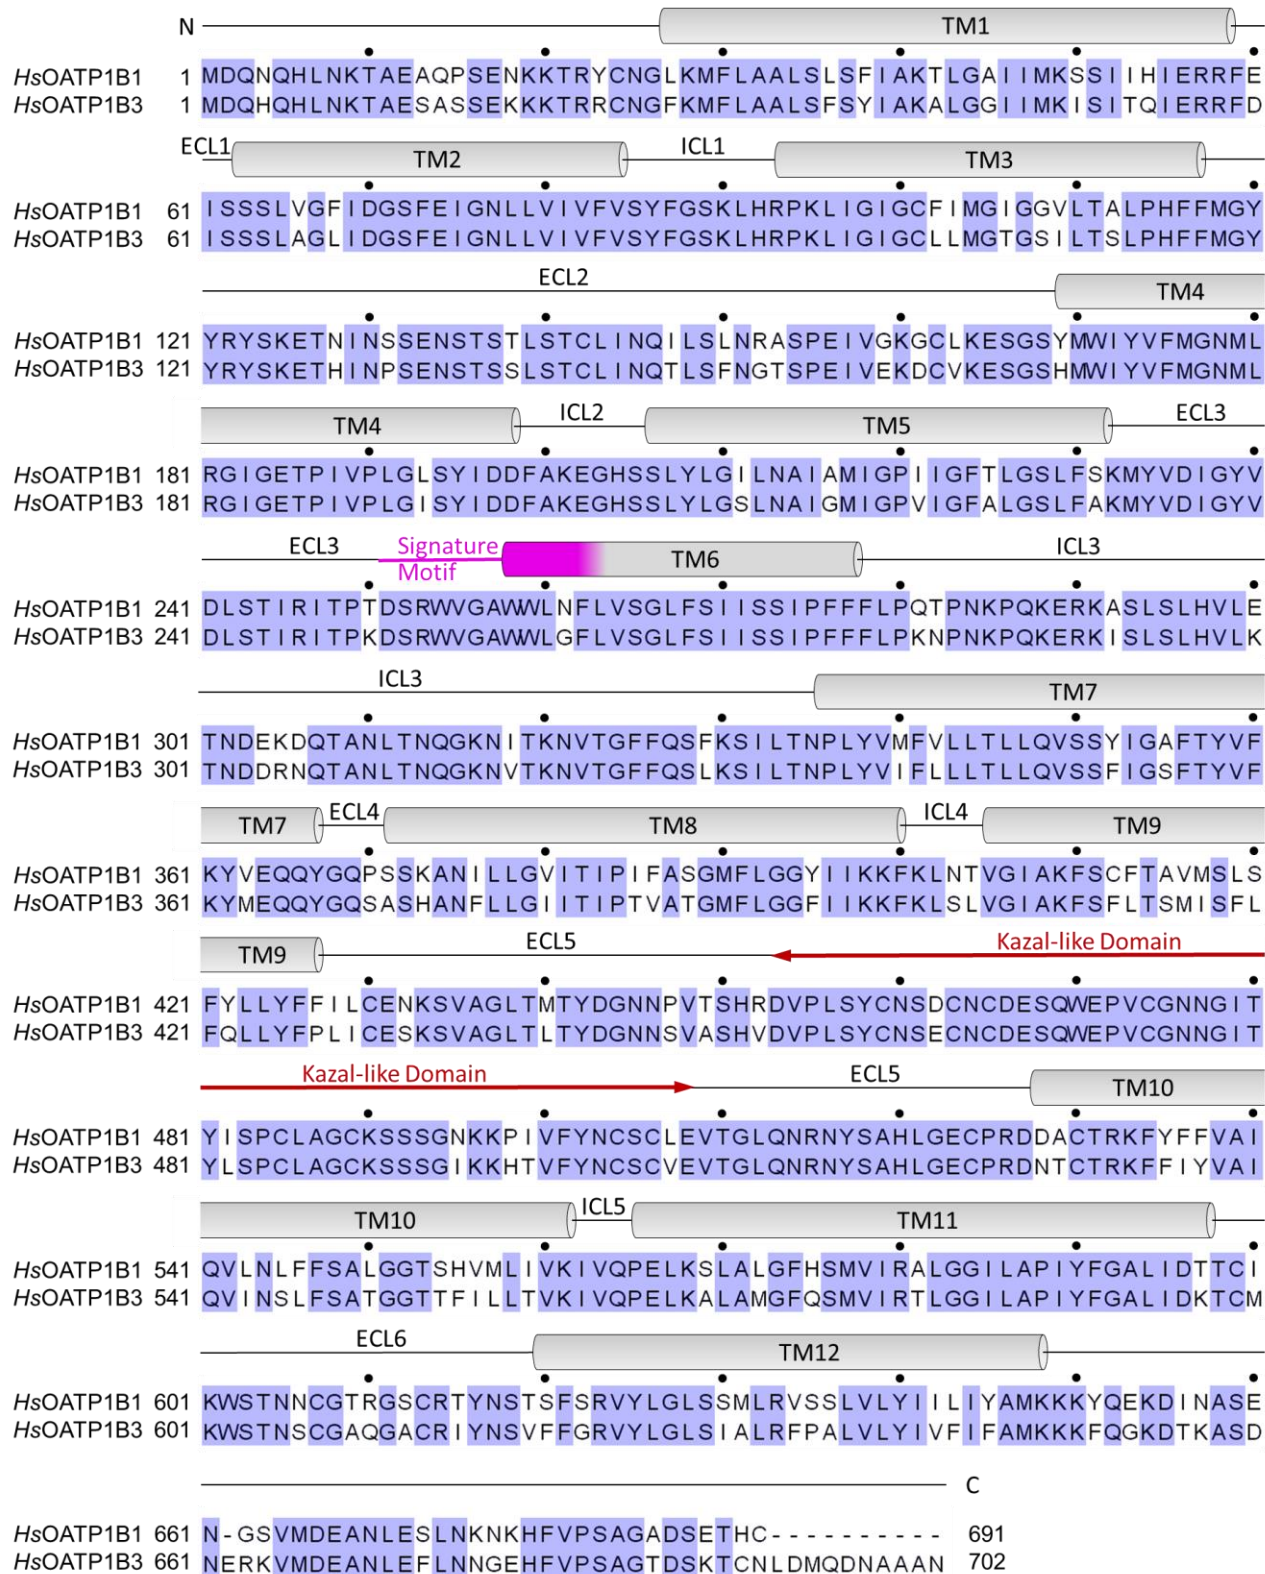

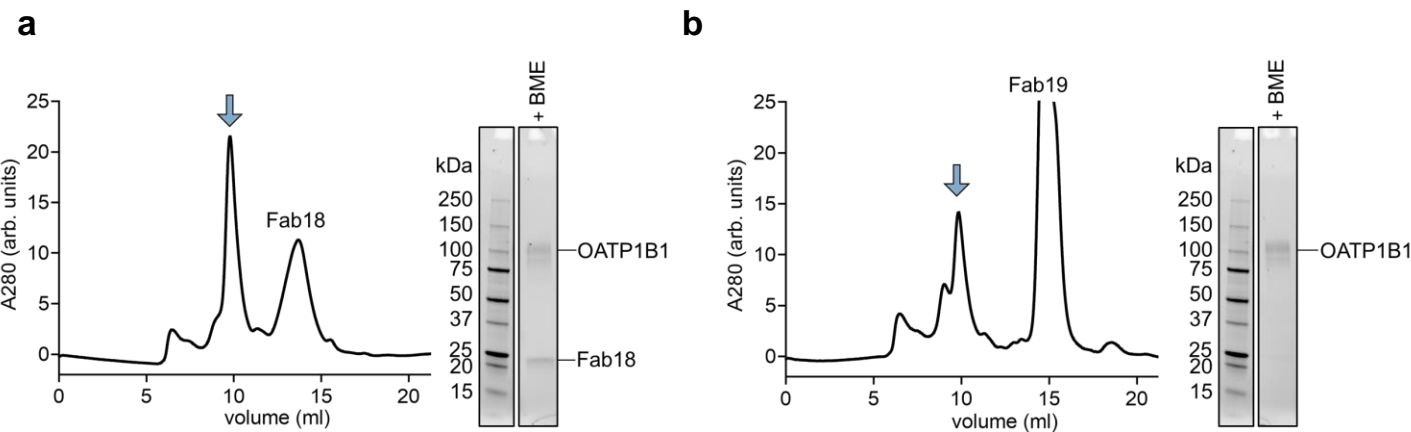

**Supplementary Fig. 2. Testing cross-reactivity between OATP1B3 Fabs and antigen OATP1B1.**

**a** Complex formation of detergent-solubilized OATP1B1 and Fab18. Blue arrow indicates the fraction used SDS-PAGE analysis in the presence of 2-mercaptoethanol. **b** Complex formation of detergent-solubilized OATP1B1 and Fab19. Blue arrow indicates the fraction used SDS-PAGE analysis in the presence of 2-mercaptoethanol. The SDS-PAGE image of the ladder and the sample originate from the same gel image.

**a**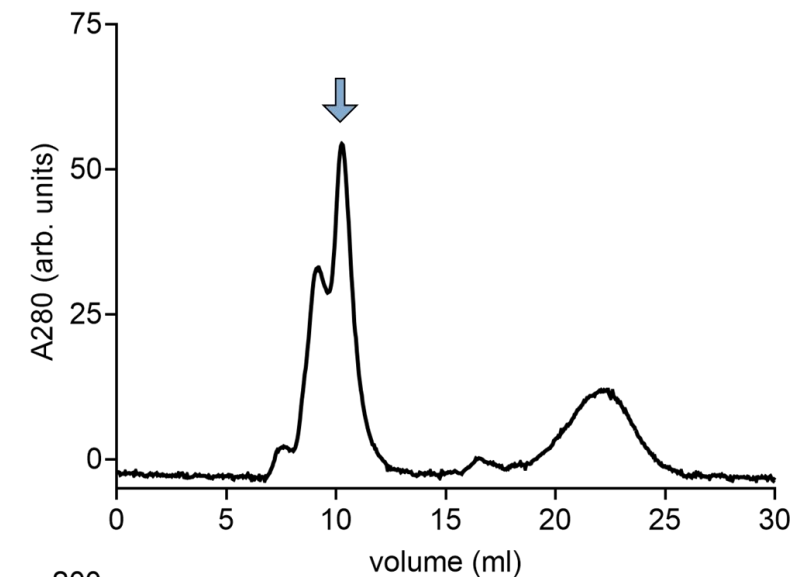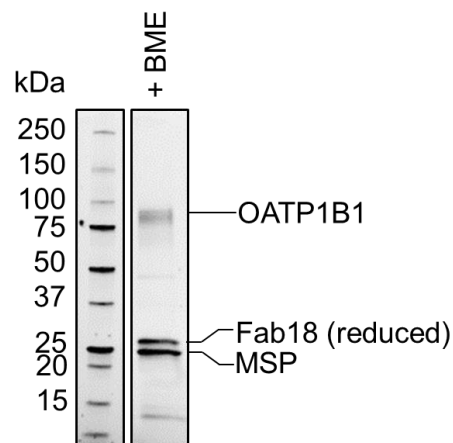**b**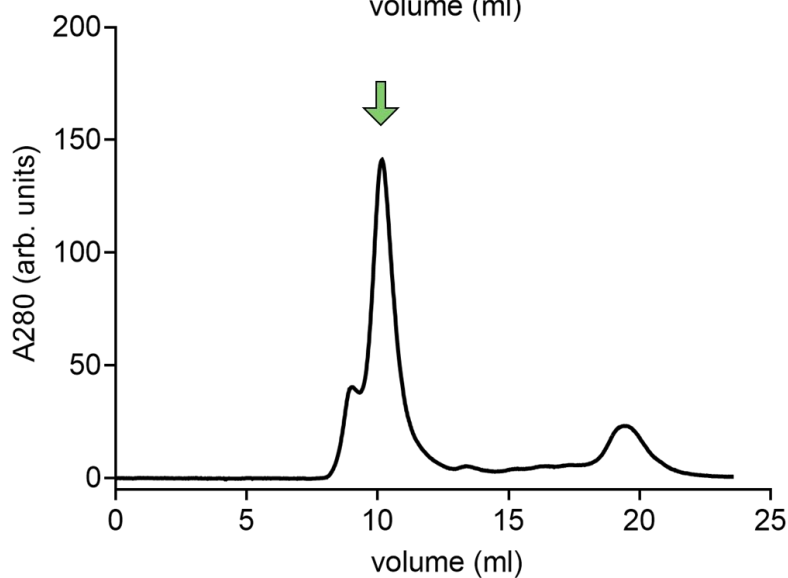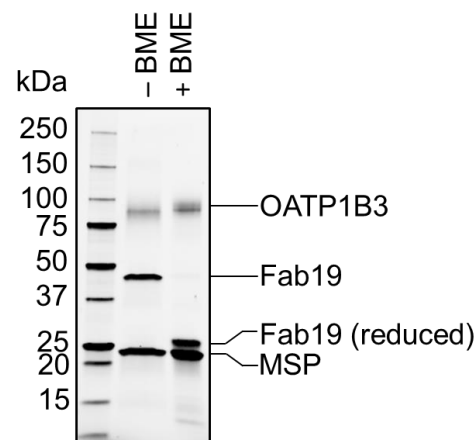

**Supplementary Fig. 3. Sample preparation of OATP1B1-Fab18 and OATP1B3-Fab19 for cryo-EM analysis.**

**a** Size exclusion chromatography (SEC) of OATP1B1-Fab18. Blue arrow indicates the fraction used for grid preparation. SDS-PAGE analysis of the pooled fraction in the presence of 2-mercaptoethanol (BME). The SDS-PAGE image of the ladder and the sample originate from the same gel image. **b** Size exclusion chromatography (SEC) of OATP1B3-Fab19. Green arrow indicates the fraction used for grid preparation. SDS-PAGE analysis of the pooled fraction in the absence and presence of 2-mercaptoethanol.

**a**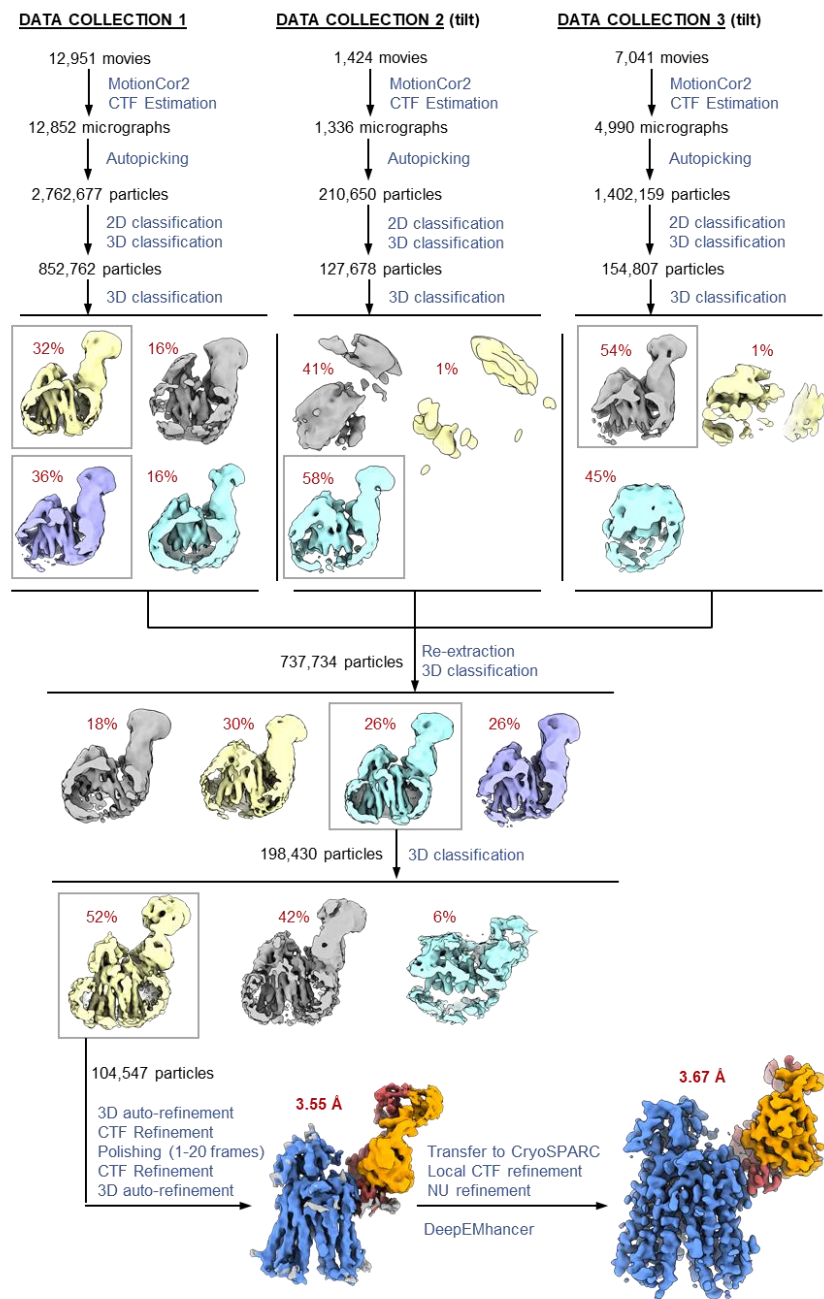**b**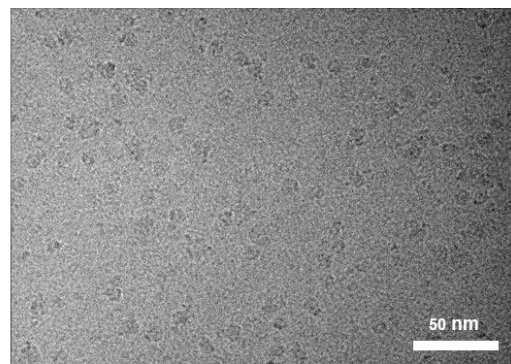**c**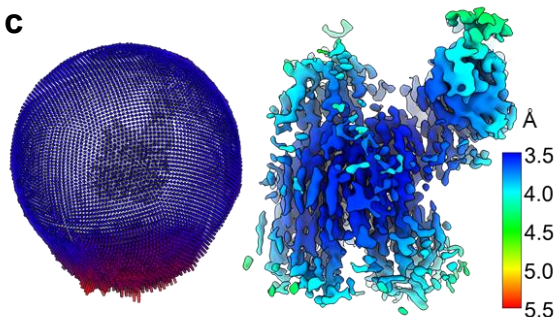**d**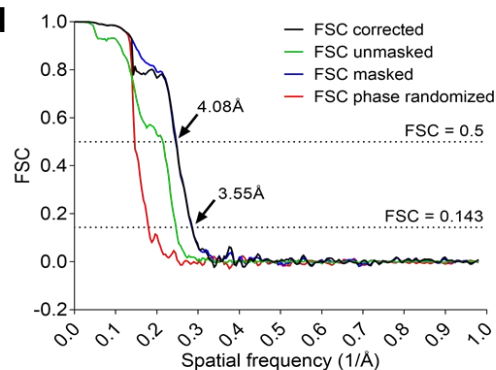

**Supplementary Fig. 4. Cryo-EM analysis of E1S-bound OATP1B1 in a complex with Fab18.**

**a** Flowchart presenting the pipeline of data processing in Relion 4. **b** Representative micrograph of imaged sample. **c** Angular distribution of the particles (*left*) and local resolution estimates of the final EM density map (*right*). **d** FSC curves of the final EM density maps calculated in Relion 4 (top) and cryoSPARC (bottom).



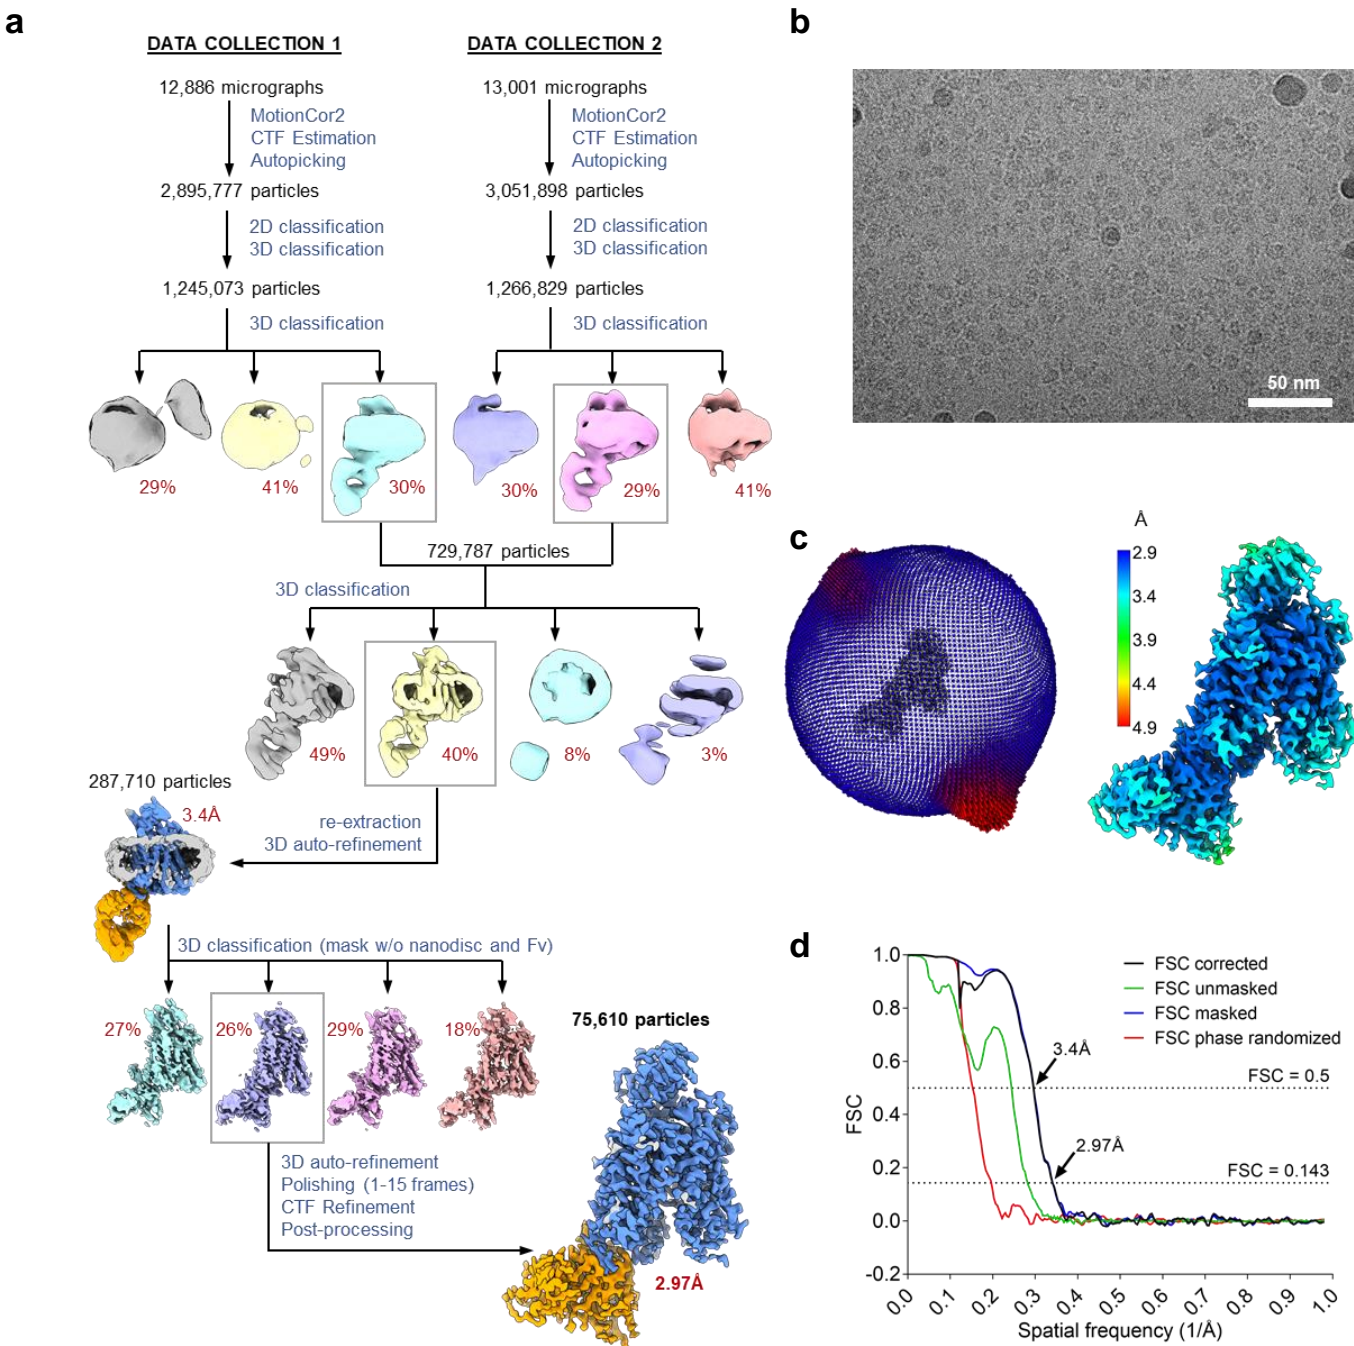

**Supplementary Fig. 5. Cryo-EM analysis of bicarbonate-bound OATP1B3 in a complex with Fab19.**

**a** Flowchart presenting the pipeline of data processing in Relion 4. **b** Representative micrograph of imaged sample. **c** Angular distribution of the particles (*left*) and local resolution estimates of the final EM density map (*right*). **d** FSC curves of the final EM density maps calculated in Relion 4.

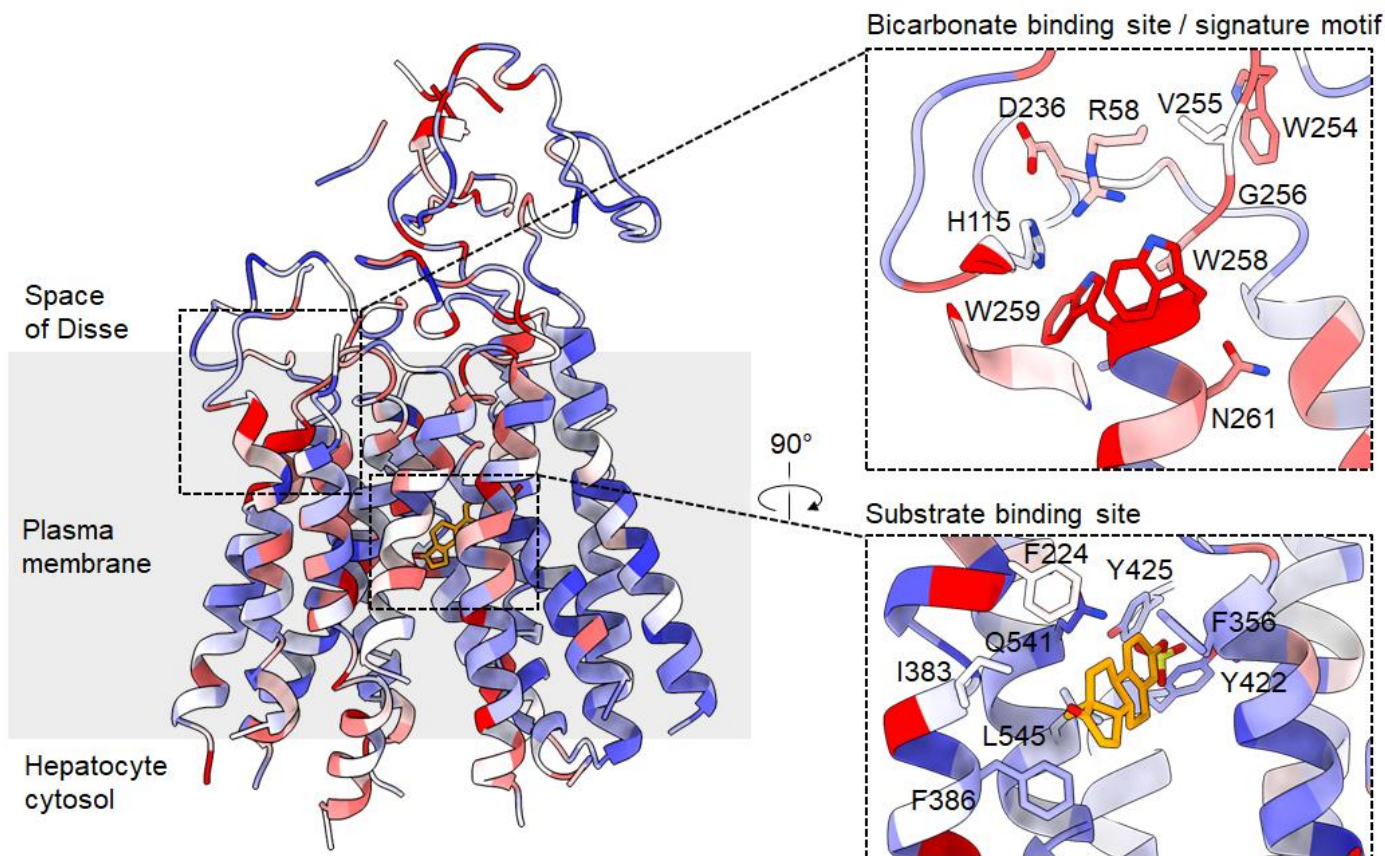

**Supplementary Fig. 6. Sequence conservation in the family of human OATPs.**

(left) Cartoon representation of E1S-bound structure of OATP1B1 colored based on conservation within human OATP family. Red and blue color indicate conserved and non-conserved residues, respectively. Eleven proteins in the OATP family was taken into analysis (those shown in Fig. 6b). (right) Close-up views on the bicarbonate binding site and the organic anion drug binding site. The relevant residues, which are described in the text, are displayed as sticks and labeled.

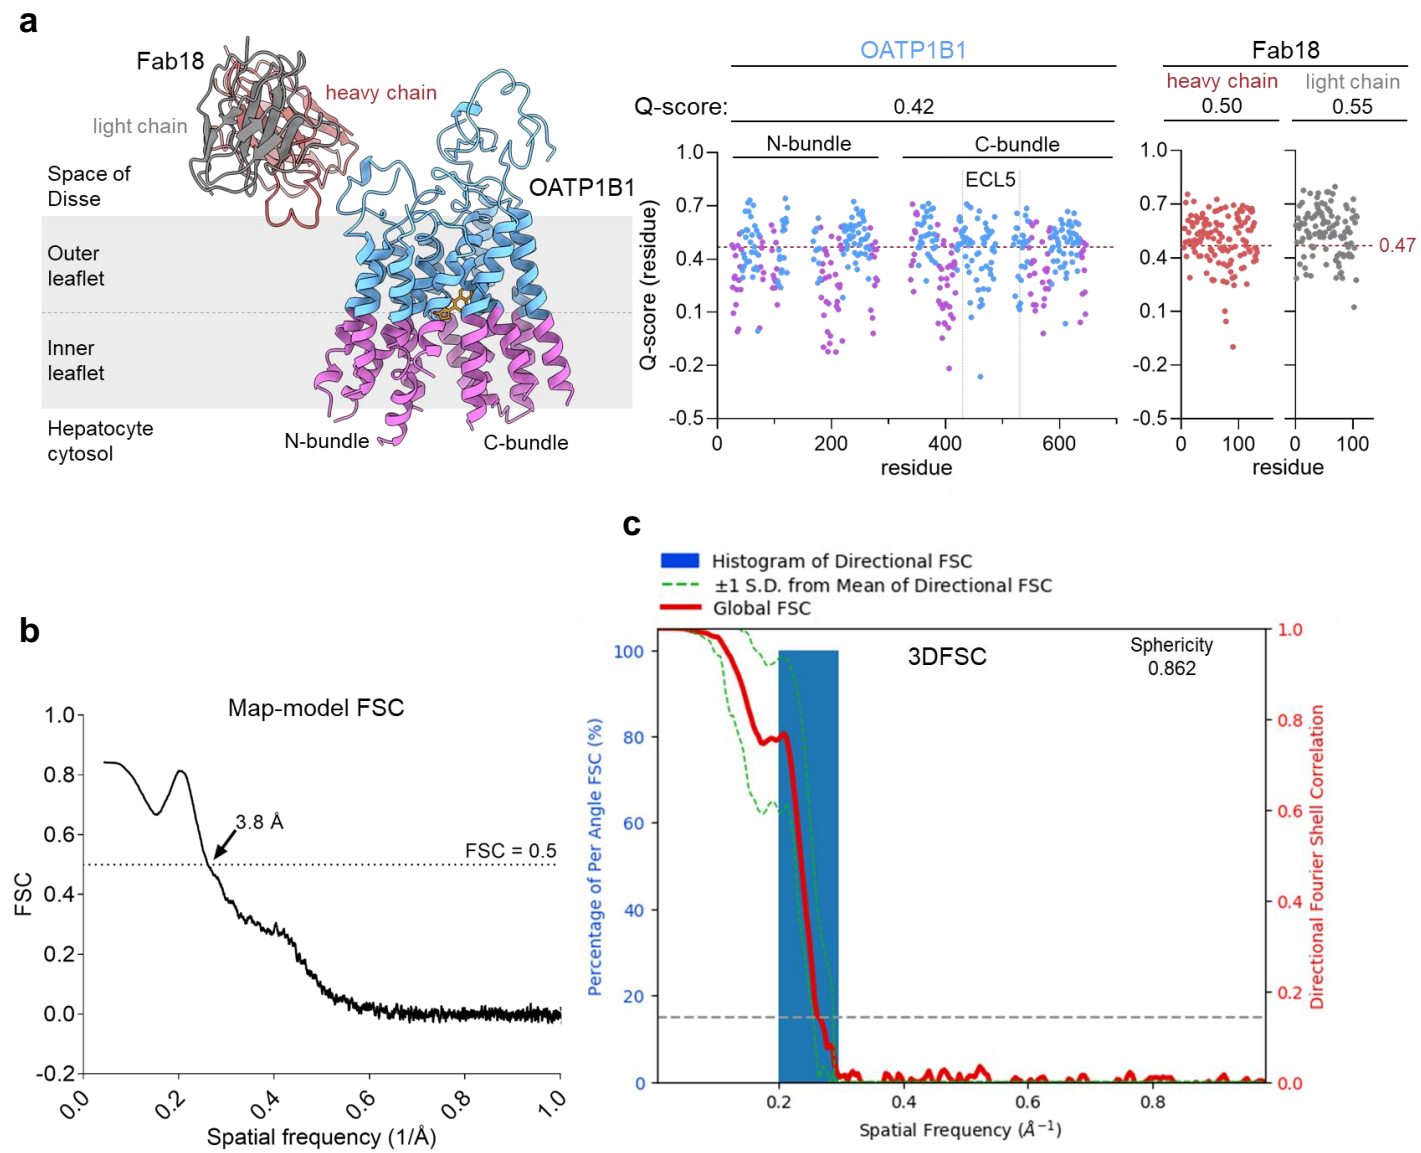

**Supplementary Fig. 7. Analyses of EM density map and model of E1S-bound OATP1B1 in a complex with Fab18.**

**a** Per-residue Q-scores for each residues. The colors of the ribbon representation on the left correspond to the Q-score data points on the right panel. The red, dotted line and the value indicates the expected Q-score based on the calculated resolution of the map (as per the 0.143 criterion). **b** The map-to-model FSC calculation. **c** Histogram and directional FSC generated on the remote 3DFSC processing server. Sphericity values are indicated.



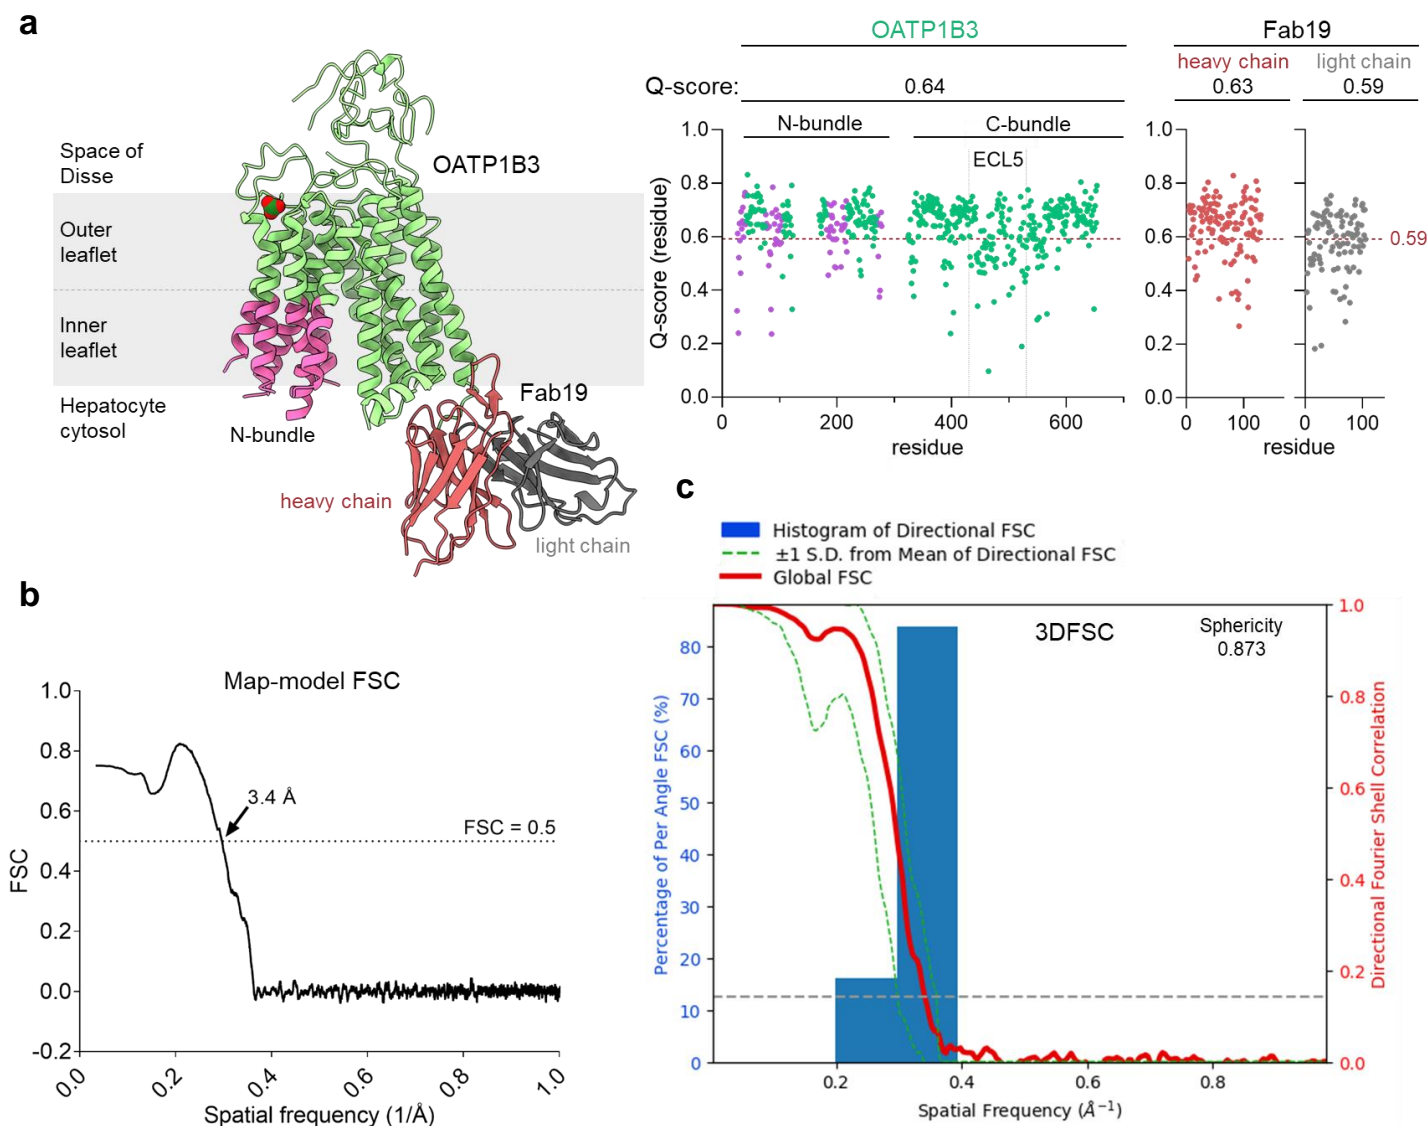

**Supplementary Fig. 8. Analyses of EM density map and model of bicarbonate-bound OATP1B3 in a complex with Fab19.**

**a** Per-residue Q-scores for each residues. The colors of the ribbon representation on the left correspond to the Q-score data points on the right panel. The red, dotted line and the value indicates the expected Q-score based on the calculated resolution of the map (as per the 0.143 criterion). **b** The map-to-model FSC calculation. **c** Histogram and directional FSC generated on the remote 3DFSC processing server. Sphericity values are indicated.

**Supplementary Table 1. Cryo-EM data collection, refinement and validation statistics.**

|                                                  | <b>E1S-bound<br/>OATP1B1-Fab18<br/>(EMDB-17677)<br/>(PDB 8PHW)</b> | <b>Bicarbonate-bound<br/>OATP1B3-Fab19<br/>(EMDB-17655)<br/>(PDB 8PG0)</b> |
|--------------------------------------------------|--------------------------------------------------------------------|----------------------------------------------------------------------------|
| <b>Data collection and processing</b>            |                                                                    |                                                                            |
| Magnification                                    | 165,000                                                            | 165,000                                                                    |
| Voltage (kV)                                     | 300                                                                | 300                                                                        |
| Electron exposure (e-/Å <sup>2</sup> )           | 60.5                                                               | 60.5                                                                       |
| Defocus range (µm)                               | -0.6 - -2.2                                                        | -0.6 - -2.2                                                                |
| Pixel size (Å)                                   | 0.51                                                               | 0.51                                                                       |
| Super-resolution (Å)                             | 0.255                                                              | 0.255                                                                      |
| Symmetry imposed                                 | C1                                                                 | C1                                                                         |
| Movies (no.)                                     | 21,416                                                             | 25,887                                                                     |
| Initial particle images (no.)                    | 4,375,486                                                          | 5,947,675                                                                  |
| Final particle images (no.)                      | 104,547                                                            | 75,610                                                                     |
| Map resolution (Å)                               | 3.55 / 3.67                                                        | 2.97                                                                       |
| FSC threshold                                    | 0.143                                                              | 0.143                                                                      |
| <b>Refinement</b>                                |                                                                    |                                                                            |
| Initial model used (PDB code)                    | -                                                                  | -                                                                          |
| Model resolution (Å)                             | 2.1                                                                | 2.8                                                                        |
| FSC threshold                                    | 0.143                                                              | 0.143                                                                      |
| Map sharpening <i>B</i> factor (Å <sup>2</sup> ) | -80                                                                | -70                                                                        |
| Model composition                                |                                                                    |                                                                            |
| Non-hydrogen atoms                               | 5351                                                               | 5812                                                                       |
| Protein residues                                 | 689                                                                | 737                                                                        |
| Ligands                                          | FY5: 1                                                             | BCT: 1 NAG: 1                                                              |
| Cholesterol                                      | Y01: 1                                                             | CLR: 3                                                                     |
| <i>B</i> factors (Å <sup>2</sup> )               |                                                                    |                                                                            |
| Protein                                          | 85.63                                                              | 39.75                                                                      |
| Ligand                                           | 54.10                                                              | 71.77                                                                      |
| R.m.s. deviations                                |                                                                    |                                                                            |
| Bond lengths (Å)                                 | 0.004                                                              | 0.022                                                                      |
| Bond angles (°)                                  | 0.708                                                              | 0.951                                                                      |
| Validation                                       |                                                                    |                                                                            |
| MolProbity score                                 | 2.62                                                               | 2.04                                                                       |
| Clashscore                                       | 10.67                                                              | 16.45                                                                      |
| Poor rotamers (%)                                | 6.22                                                               | 0.80                                                                       |
| Ramachandran plot                                |                                                                    |                                                                            |
| Favored (%)                                      | 92.53                                                              | 95.37                                                                      |
| Allowed (%)                                      | 7.47                                                               | 4.21                                                                       |
| Disallowed (%)                                   | 0.00                                                               | 0.42                                                                       |
