# Supplementary material for: Structure of human drug transporters OATP1B1 and OATP1B3
Source: Nat Commun. 2023 Sep 18;14:5774. doi: 10.1038/s41467-023-41552-8 (PMC10507018; doi:10.1038/s41467-023-41552-8)
Supplement: Supplementary file 4 — Source Data [file 41467_2023_41552_MOESM4_ESM.xlsx]

## Sheet: Sheet1
	Source Data for "Structure of human drug transporters OATP1B1 and OATP1B3"
		Figure 2a
	OATP1B1	pmol E1S / mg total protein / min
	control	1.85	0.26	1.56	2.33	0.79	2.76
	induced	48.13	39.11	77.66	68.32	77.8
	+Atorvastatin	6.23	11.93	3.84	5.3	3.68	4.98
	+Pitavastatin	20.65	22.28	17.17	16.07	25.49	24.24
	OATP1B3	pmol E17BG / mg total protein / min
	control	0.67	1.87	1.52	1.78
	induced	10.34	10.94	11.28	9.37	8.9	8.17
	+Telmisartan	2.98	2.28	1.13	2.38	1.83
	+Pitavastatin	3.81	3.79	3.7	2.93	1.83
		Supplementary Figure 2
		Supplementary Figure 3a
		Supplementary Figure 3b
